# Supplementary material
Source: publisher site journal article supplement (https://www.dovepress.com/article/367073)
Supplement: Supplementary file 1 [file get_supplementary_file.php]

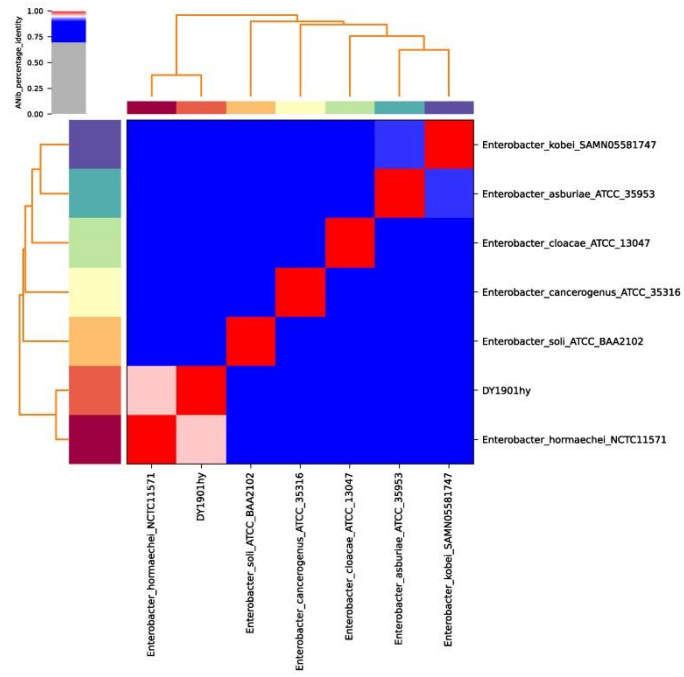

Figure S1. ANI analysis results of *E. hormaechei* DY1901.

Table S1. Primer names and sequences

| The name of the primer         | sequence (5'-3')       |
|--------------------------------|------------------------|
| <i>bla</i> <sub>KPC</sub> -F   | CAGCTCATTCAAGGGCTTTCTT |
| <i>bla</i> <sub>KPC</sub> -R   | GCAGACTCCTAGCCTAAATGTG |
| <i>bla</i> <sub>IMP</sub> -F   | GTAGTTTATTGGTCTACATGAC |
| <i>bla</i> <sub>IMP</sub> -R   | AGTTTCAAGAGTGATGCGTCT  |
| <i>bla</i> <sub>NDM</sub> -F   | GCTACAGTGAACCAAATTAAG  |
| <i>bla</i> <sub>NDM</sub> -R   | AATGGCTCATCACGATCATG   |
| <i>bla</i> <sub>VIM</sub> -F   | GTAGTTTATTGGTCTACATGAC |
| <i>bla</i> <sub>VIM</sub> -R   | TTGTGTGCTTTGACAACGTT   |
| <i>bla</i> <sub>OXA48</sub> -F | ATGCGTGTATTAGCCTTATCG  |
| <i>bla</i> <sub>OXA48</sub> -R | TTCCTGTTTGAGCACTTCT    |
| <i>mcr-1</i> _F                | TCCAAAATGCCCTACAGACC   |
| <i>mcr-1</i> _R                | GCCACCACAGGCAGTAAAT    |
| <i>mcr-2</i> _F                | CCTTTTGTGCTGATGGGTTT   |
| <i>mcr-2</i> _R                | ATTTTGGAGCATGGTGGTGT   |
| <i>mcr-3</i> _F                | CTTGCTGAACCAATCCCATT   |
| <i>mcr-3</i> _R                | CCATCGTTCTCCTTCCACAAAA |
| <i>mcr-4</i> _F                | GATCCGAAGCTGTGTTCTG    |
| <i>mcr-4</i> _R                | GCCAGCATTGGTACGCTAGT   |
| <i>mcr-5</i> _F                | GGTTGGCCGAGAAGATAACA   |
| <i>mcr-5</i> _R                | ATGTTGCCAGAAGGTCCAAC   |
| <i>mcr-6</i> _F                | AGCTATGTCAATCCCGTGAT   |
| <i>mcr-6</i> _R                | ATTGGCTAGGTTGTCAATC    |
| <i>mcr-7</i> _F                | GTCAGTTACGCCATGCTCAA   |
| <i>mcr-7</i> _R                | TTCTTGTGCGAGAAGTGTGG   |
| <i>mcr-8</i> _F                | AAACTGAACCCGGTACAACG   |
| <i>mcr-8</i> _R                | GCCATAGCACCTCAACACCT   |
| <i>mcr-9</i> _F                | GCGGTTGTAAAGGCGTATGT   |
| <i>mcr-9</i> _R                | CAAATCGCGGTCAGGATTAT   |
